# Supplementary material for: Metagenomic insights into the microbial community of the Buhera soda pans, Zimbabwe
Source: PubMed Central journal article supplement — BMC Microbiol. 2024 Nov 29;24:510. doi: 10.1186/s12866-024-03655-0 (PMC11605927; doi:10.1186/s12866-024-03655-0), 2024-11-29
Supplement: 12866_2024_3655_MOESM2_ESM.pdf [file 12866_2024_3655_MOESM2_ESM.pdf]

**Additional File 2:** Metagenomic sequence read statistical quality parameters.

| <b>Object Name</b>         | <b>Buhera Soda Pan Metagenomic Sequence</b> |
|----------------------------|---------------------------------------------|
| Number of Reads            | 35,876,873                                  |
| Total Number of Bases      | 3,587,687,300                               |
| Mean Read Length           | 100.0                                       |
| Base quality score (range) | 34 – 36                                     |
| Mean base quality score    | 35.45                                       |
| Read quality score (range) | 24 – 38                                     |
| Mean read quality score    | 36.0                                        |
| GC Percentage              | 52.08%                                      |
